# Supplementary material for: Cryo-EM structure of cardiac amyloid fibrils from an immunoglobulin light chain AL amyloidosis patient
Source: PubMed Central journal article supplement (PMC6427027; doi:10.1038/s41467-019-09133-w), 2019-03-20

## Editorial Policy Checklist

This form is used to ensure compliance with Nature Research editorial policies related to research ethics and reproducibility. For further information, please see our [Authors & Referees](#) site. All relevant questions on the form must be answered.

### ▶ Competing interests

Policy information about [competing interests](#)

#### Competing interests declaration

In the interest of transparency and to help readers form their own judgements of potential bias, Nature Research journals require authors to declare any competing financial and/or non-financial interest in relation to the work described in the submitted manuscript.

No, I declare that the authors have no competing financial or non-financial interests as defined by Nature Research.

Yes, I declare that the authors have a competing interest as defined by Nature Research

### ▶ Data availability

Policy information about [availability of data](#)

#### Data availability statement

All manuscripts must include a [data availability statement](#). This statement should provide the following information, where applicable:

- Accession codes, unique identifiers, or web links for publicly available datasets
- A list of figures that have associated raw data
- A description of any restrictions on data availability

A full data availability statement is included in the manuscript.

#### Mandated accession codes ([where applicable](#))

Confirm that all relevant data are deposited into a public repository and that accession codes are provided.

All relevant accession codes are provided  Accession codes will be available before publication  No data with mandated deposition

### ▶ Data presentation

#### Image integrity

Confirm that all images comply with our [image integrity policy](#).

Unprocessed data must be provided upon request. Please double-check figure assembly to ensure that all panels are accurate (e.g. all labels are correct, no inadvertent duplications have occurred during preparation, etc.).

#### Data distribution

Present data in a format that shows data distribution (dot-plots or box-and-whisker plots).

Define all box-plot elements (e.g. center line, median; box limits, upper and lower quartiles; whiskers, 1.5x interquartile range; points, outliers).

If using bar graphs, overlay the corresponding dot plots.

Confirm that all data presentation meets these requirements and that individual data points are shown.

## Specific policy considerations

Some types of research require additional policy disclosures. Please indicate whether these apply to your study. If you are not certain, please read the appropriate section before selecting a response.

| Does not apply           | Involved in the study                                                                                   |
|--------------------------|---------------------------------------------------------------------------------------------------------|
| <input type="checkbox"/> | <input type="checkbox"/> Custom software or computer code                                               |
| <input type="checkbox"/> | <input checked="" type="checkbox"/> Macromolecular structural data                                      |
| <input type="checkbox"/> | <input type="checkbox"/> Research animals and/or animal-derived materials that require ethical approval |
| <input type="checkbox"/> | <input type="checkbox"/> Human research participants                                                    |
| <input type="checkbox"/> | <input checked="" type="checkbox"/> Clinical data                                                       |

## ▶ Code availability

Policy information about [availability of computer code](#)

### Code availability statement

For all studies using custom code, the Methods section must include a statement under the heading "Code availability" describing how readers can access the code, including any access restrictions.

A full code availability statement is included in the manuscript

## ▶ Macromolecular structural data

Policy information about [special considerations](#) for specific types of data

### Validation report

For all macromolecular structures studied, confirm that you have provided an official validation report from [wwPDB](#).

## ▶ Research animals

Policy information about [studies involving animals](#); [ARRIVE guidelines](#) recommended for reporting animal research

### Ethical compliance

Confirm that you have complied with all relevant ethical regulations and that a statement affirming this is included in the manuscript.

### Ethics committee

Confirm that the manuscript states the name(s) of the board and institution that approved the study protocol.

## ▶ Human research participants

Policy information about [studies involving human research participants](#)

### Ethical compliance

Confirm that you have complied with all relevant ethical regulations and that a statement affirming this is included in the manuscript.

### Ethics committee

Confirm that the manuscript states the name(s) of the board and/or institution that:

Approved the study protocol -OR-  Provided guidelines for study procedures (if protocol approval is not required)

### Informed consent

Confirm that informed consent was obtained from all participants.

### Identifiable images

For publication of identifiable images of research participants, confirm that consent to publish was obtained and is noted in the Methods.

Authors must ensure that consent meets the conditions set out in the [Nature Research participant release form](#).

Yes  No identifiable images of human research participants

## ▶ Clinical studies

Policy information about [clinical studies](#)

### Clinical trial registration

Confirm that you have provided the trial registration number from [ClinicalTrials.gov](#) or an equivalent agency in the manuscript.

### Phase 2 and 3 randomized controlled trials

Confirm that you have provided the [CONSORT checklist](#) with your submission.

Yes  No  Not a phase 2/3 randomized controlled trial

### Tumor marker prognostic studies

Did you follow the [REMARK reporting guidelines](#)?

Yes  No  Not a tumor marker prognostic study

I certify that all the above information is complete and correct.

Typed signature Double-blind peer review submissions: type DBPR here as a signature. Date Feb 6, 2019

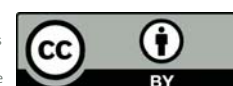

Supplement: 41467_2019_9133_MOESM3_ESM.pdf [file 41467_2019_9133_MOESM3_ESM.pdf]
